# Supplementary material for: Evaluation of pure shift NMR methods for the analysis of complex metabolite mixtures with a benchtop NMR spectrometer
Source: Royal Society of Chemistry journal article supplement (doi:10.1039/d5ay00006h), 2025-01-01
Supplement: d5ay00006h1.pdf [file d5ay00006h1.pdf]

Electronica Supplementary Material (ESI) for Analytical Methods

This journal is © The Royal Society of Chemistry 2023

**Evaluation of pure shift NMR methods for the analysis of complex metabolite mixtures with a benchtop NMR spectrometer**

Joris Mandral,<sup>a</sup> Simon Roques,<sup>b,c</sup> Jean-Nicolas Dumez,<sup>a</sup> Patrick Giraudeau<sup>a\*</sup> and Jonathan Farjon<sup>a\*</sup>

*a. Nantes Université, CNRS, CEISAM, UMR 6230, F-44000 Nantes, France*

*b. INRA, Univ Pau & Pays Adour, E2S UPPA, UMR 1419, Nutrition Métabolisme, Aquaculture, 64310 Saint Pée sur Nivelle, France*

*c. Present adress : Université Clermont Auvergne, INRAE, VetAgro Sup, UMR Herbivores, Saint-Genes-Champanelle, France*

*\*jonathan.farjon@univ-nantes.fr; patrick.giraudeau@univ-nantes.fr;*

**Index**

|     |                                                                     |    |
|-----|---------------------------------------------------------------------|----|
| 1.  | Spectral simplification in the aromatic region .....                | 2  |
| 2.  | Annotation of the model mixture .....                               | 3  |
| 3.  | Chemical shifts assignment.....                                     | 6  |
| 4.  | Fitting of the PS spectra .....                                     | 7  |
| 5.  | Site-by-site performances of the J-RES SE .....                     | 9  |
| 6.  | Site-by-site performances of the J-RES DE.....                      | 10 |
| 7.  | Site-by-site performances of the J-RES Chirp.....                   | 11 |
| 8.  | Site-by-site performances of the single-band ZS .....               | 12 |
| 9.  | Site-by-site performances of the dual-band ZS .....                 | 13 |
| 10. | Site-by-site performances of the PSYCHE .....                       | 14 |
| 11. | Additional spectra of the fish feed of commercial formulation ..... | 15 |

# 1. Spectral simplification in the aromatic region

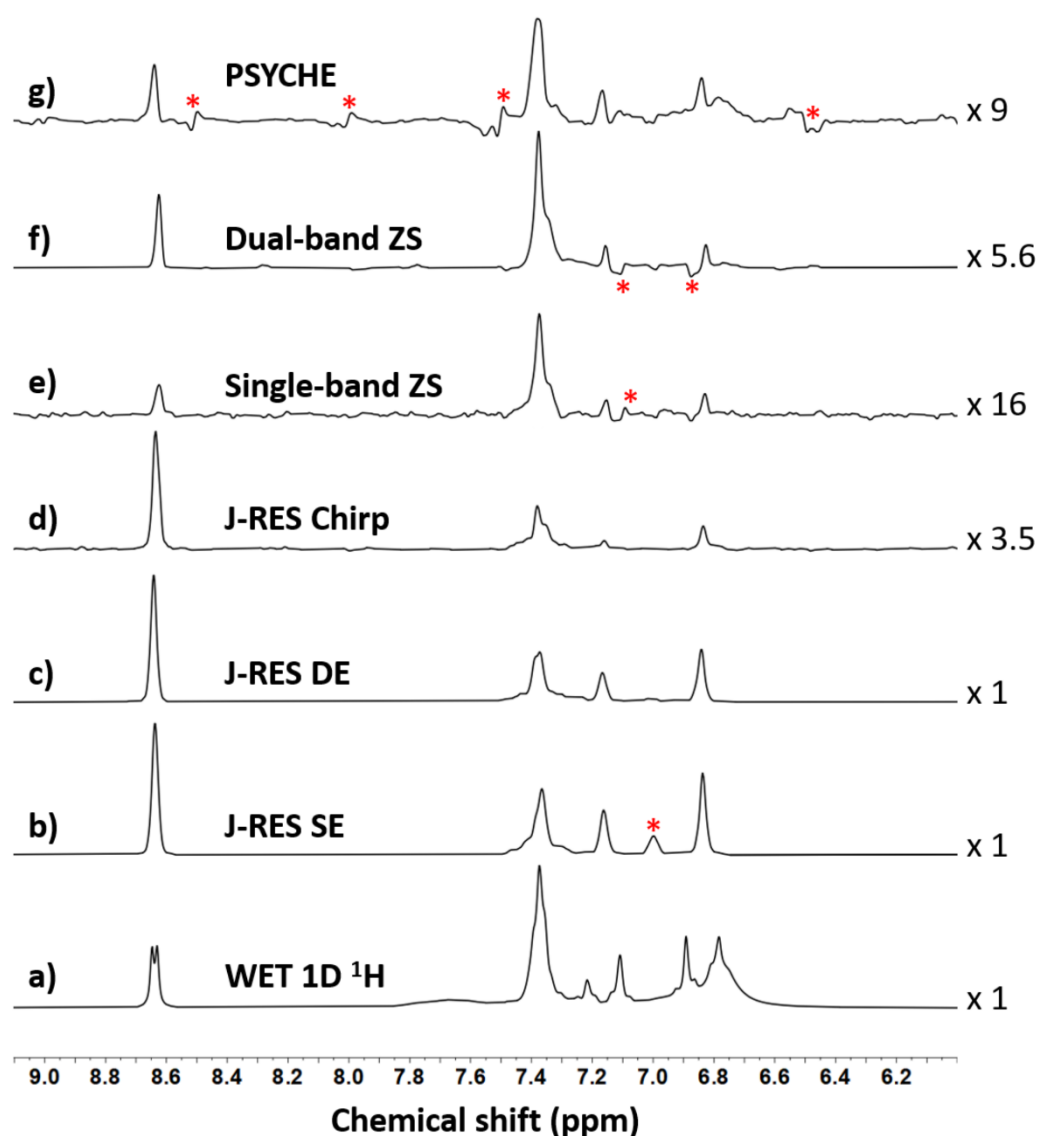

Fig.S1: Spectra acquired on the model mixture of seventeen metabolites in the aromatic spectral regions. WET based: (a) 1D  $^1\text{H}$  spectrum. (b) J-RES SE PS spectrum. (c) J-RES DE PS spectrum. (d) J-RES Chirp PS spectrum. (e) Single-band ZS PS spectrum. (f) Dual-band ZS PS spectrum. (g) PSYCHE PS spectrum. Strong coupling artefact(s)/baseline distortion(s) are symbolized by the red stars.

## 2. Annotation of the model mixture

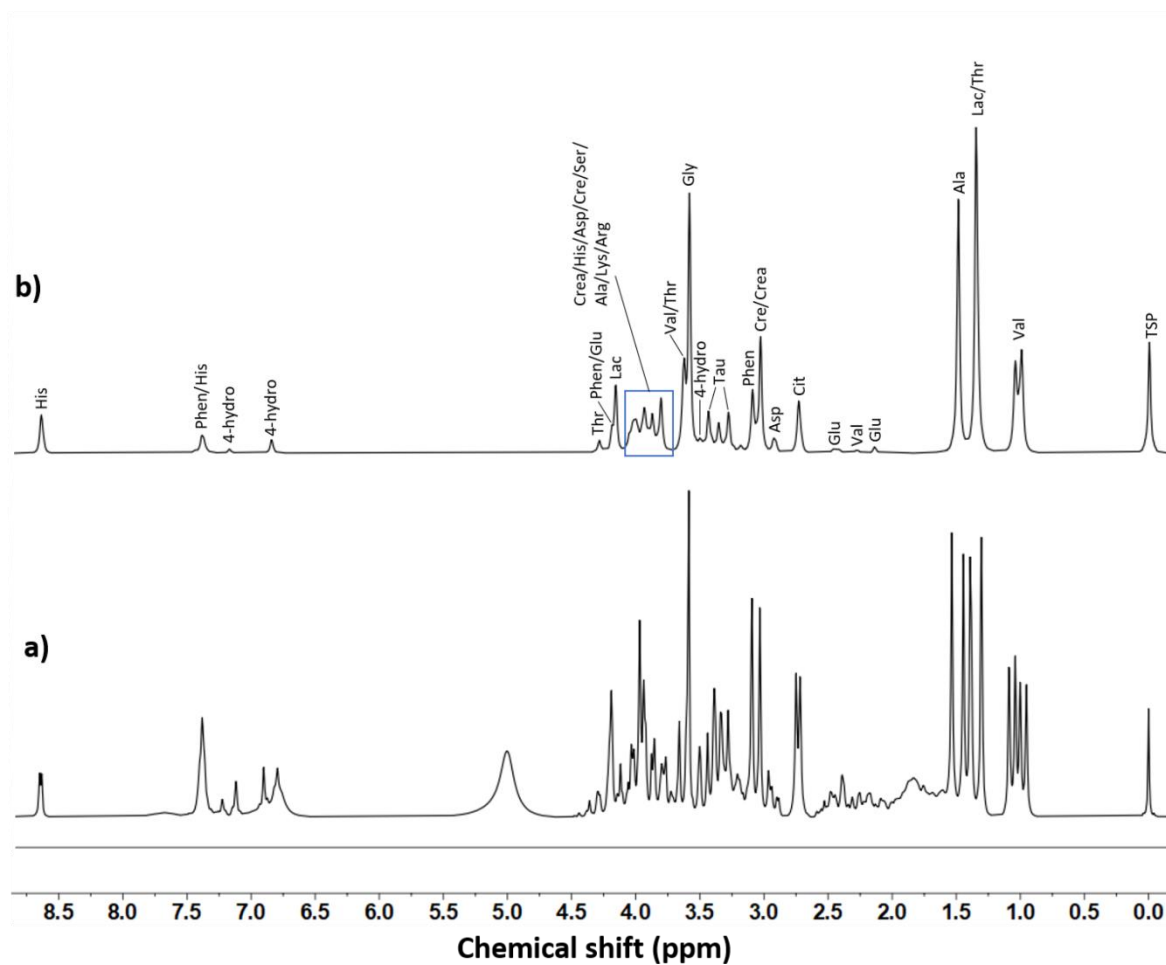

Fig.S2: Stack representation of the full WET based: (a) 1D  $^1\text{H}$  spectrum. (b) J-RES DE PS spectrum. Both spectra intensities were normalized for a clear visualization of the spectral information. The J-RES DE PS spectrum was fully annotated. Signal annotation was made with the help of Human Metabolome Database (HMDB).

In order to validate the elucidation of the model mixture of seventeen metabolites, additional 2D NMR acquisitions were performed on the 80 MHz benchtop spectrometer.

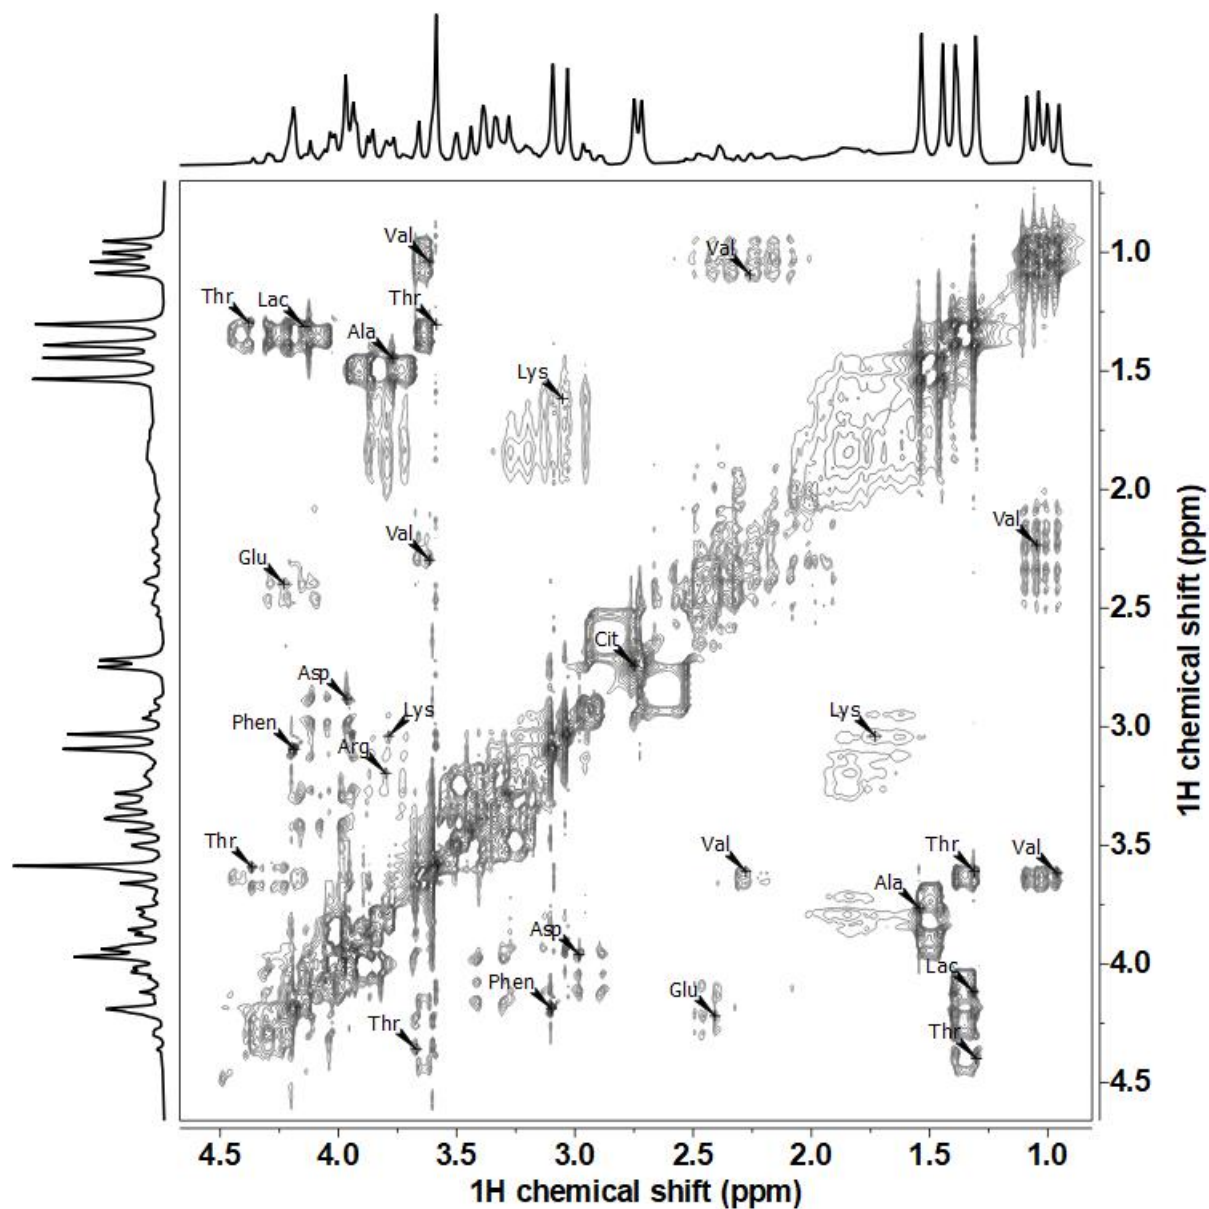

Fig.S3: WET TOtal Correlation SpectroscopY (WET TOCSY) spectrum at 80 MHz of the model mixture of seventeen metabolites in the aliphatic region. Signal annotation was made with the help of Human Metabolome Database (HMDB).

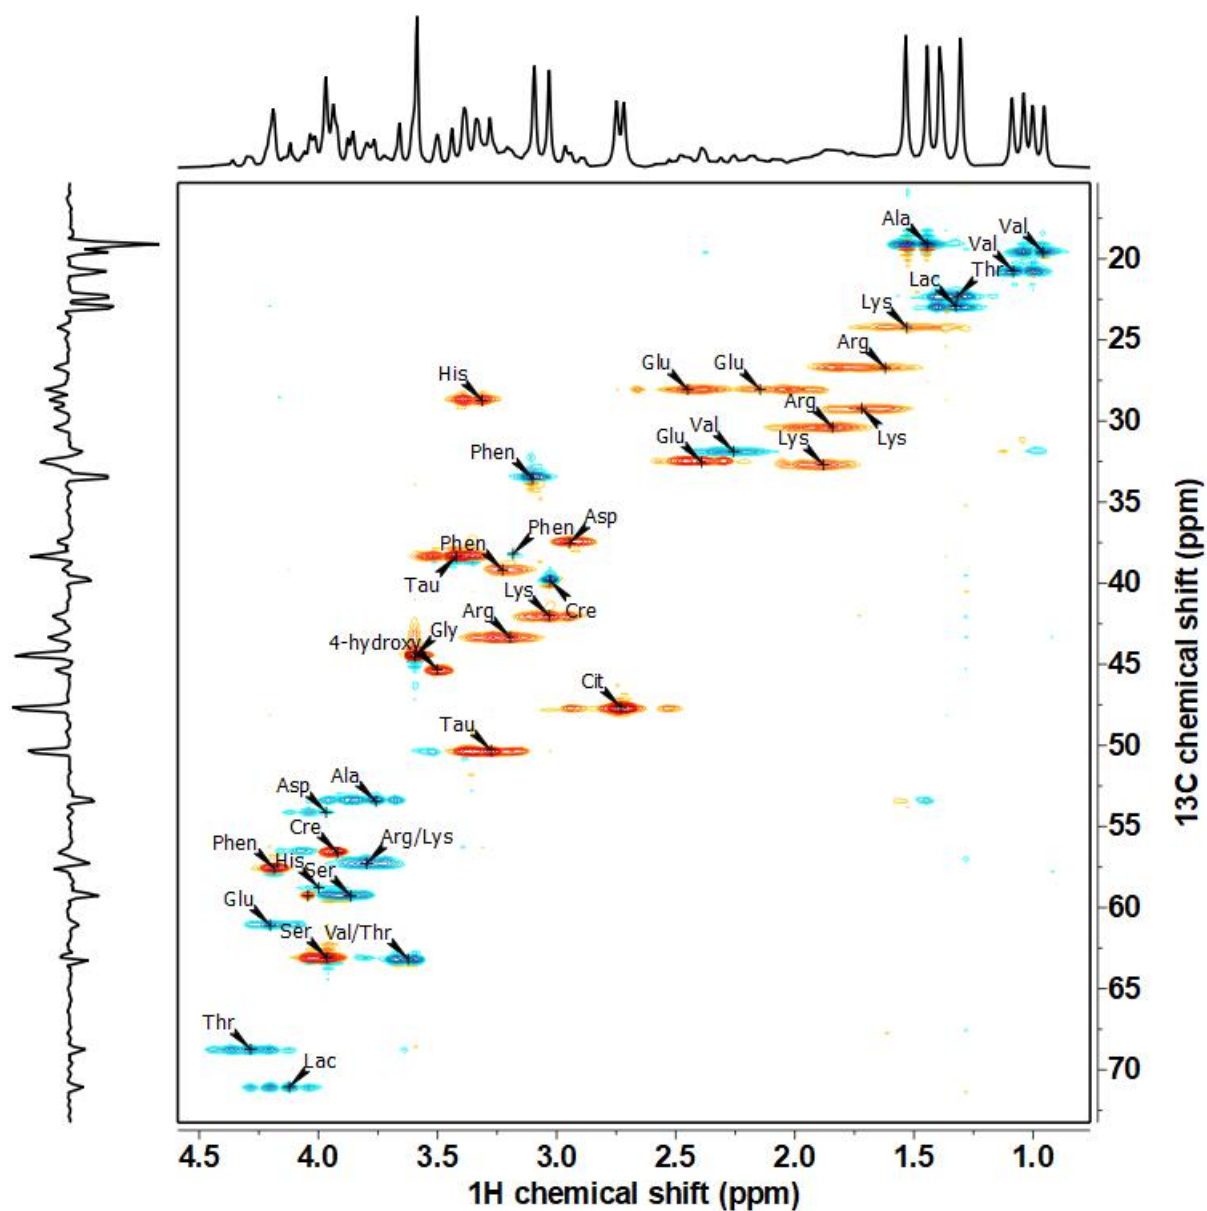

Fig.S4: Heteronuclear Single Quantum Correlation Multiplicity-Edited (HSQC-ME) spectrum at 80 MHz of the model mixture of seventeen metabolites in the aliphatic region. Full chemical shift annotations are summarized in **Table S1**. Signal annotation was made with the help of Human Metabolome Database (HMDB) and the WET TOCSY spectrum presented in Fig. S2.

### 3. Chemical shifts assignment

| N° | <sup>1</sup> H (ppm) | <sup>13</sup> C (ppm) | Annotation | N° | <sup>1</sup> H (ppm) | <sup>13</sup> C (ppm) | Annotation |
|----|----------------------|-----------------------|------------|----|----------------------|-----------------------|------------|
| 1  | 0                    | 0                     | TSP        | 24 | 3.44                 | 38.35                 | Tau        |
| 2  | 1                    | 19.59                 | Val        | 25 | 3.5                  | 45.33                 | 4-hydro    |
| 3  | 1.04                 | 20.75                 | Val        | 26 | 3.59                 | 44.5                  | Gly        |
| 4  | 1.35                 | 22.34                 | Thr        | 27 | 3.63                 | 63.17                 | Val/ Thr   |
| 5  | 1.35                 | 22.91                 | Lac        | 28 | 3.82                 | 57.28                 | Arg/ Lys   |
| 6  | 1.49                 | 19.09                 | Ala        | 29 | 3.82                 | 53.46                 | Ala        |
| 7  | 1.53                 | 24.24                 | Lys        | 30 | 3.88                 | 59.28                 | Ser        |
| 8  | 1.62                 | 26.73                 | Arg        | 31 | 3.94                 | 56.62                 | Cre        |
| 9  | 1.72                 | 29.22                 | Lys        | 32 | 3.95                 | 63.09                 | Ser        |
| 10 | 1.84                 | 30.38                 | Arg        | 33 | 3.99                 | 54.13                 | Asp        |
| 11 | 1.88                 | 32.71                 | Lys        | 34 | 4                    | 58.77                 | His        |
| 12 | 2.03                 | 28.06                 | Glu        | 35 | 4.04                 | 59.27                 | Crea       |
| 13 | 2.26                 | 31.88                 | Val        | 36 | 4.12                 | 71.06                 | Lac        |
| 14 | 2.39                 | 32.54                 | Glu        | 37 | 4.16                 | 57.61                 | Phen       |
| 15 | 2.73                 | 47.65                 | Cit        | 38 | 4.19                 | 61.1                  | Glu        |
| 16 | 2.95                 | 37.53                 | Asp        | 39 | 4.29                 | 68.74                 | Thr        |
| 17 | 3.03                 | 39.85                 | Cre        | 40 | 6.85                 | 118.21                | 4-hydro    |
| 18 | 3.03                 | 42.01                 | Lys        | 41 | 7.17                 | 133.32                | 4-hydro    |
| 19 | 3.09                 | 33.54                 | Phen       | 42 | 7.37                 | 132.16                | Phen       |
| 20 | 3.2                  | 43.33                 | Arg        | 43 | 7.37                 | 130.33                | Phen       |
| 21 | 3.23                 | 39.18                 | Phen       | 44 | 7.37                 | 131.83                | Phen       |
| 22 | 3.28                 | 50.31                 | Tau        | 45 | 7.4                  | 120.37                | His        |
| 23 | 3.31                 | 28.72                 | His        | 46 | 8.64                 | 137.14                | His        |

Table S1: Full <sup>1</sup>H and <sup>13</sup>C annotations of the model mixture of seventeen metabolites for the HSQC-ME presented in Fig.S4. Annotations in bold correspond to the signals appearing in the aromatic region.

#### 4. Fitting of the PS spectra

The removal of multiplicity provided by PS strategies divides complex spectral regions into narrower and less complex spectral regions. For very complex mixtures (like the model of seventeen metabolites), it remains difficult to fully annotate PS spectra. The following Fig.S4 and Fig.S5 show how the use of the 2D J-resolved data and deconvolution algorithms can facilitate the annotation/processing of complex regions inside PS spectra.

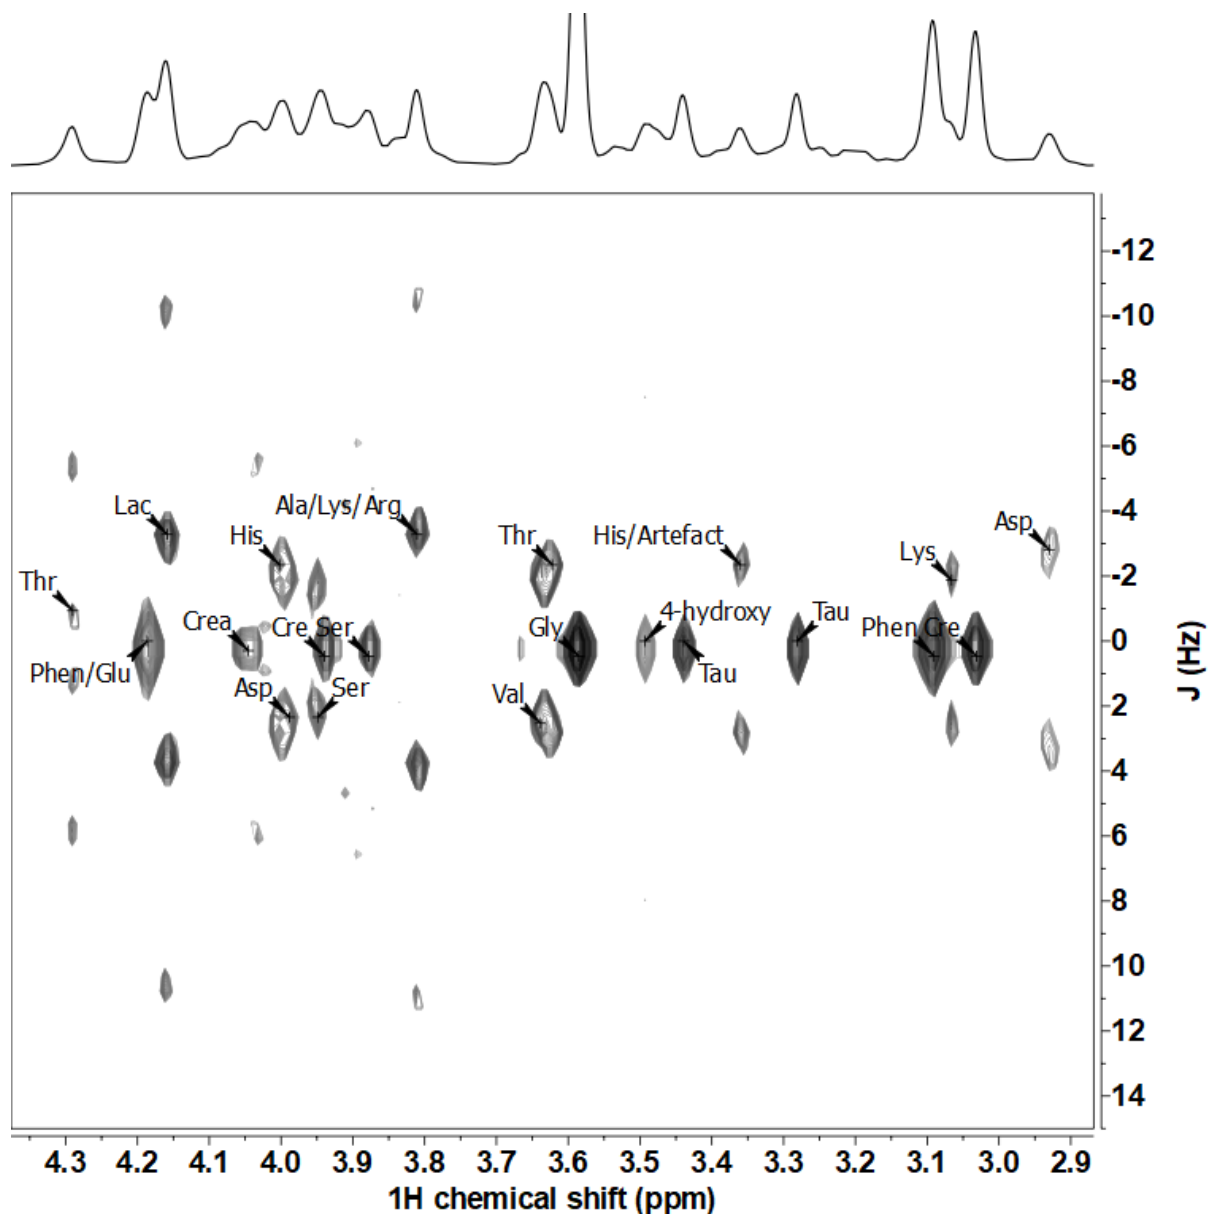

Fig.S5: Annotated 2D J-resolved spectrum (J-RES DE) after a 45° tilt and symmetrization on the spectral region ranging from 2.9 to 4.35 ppm. The most complex spectral region observed in PS spectra is highlighted in the blue square.

As illustrated in Fig.S5, the more in depth 2D data provided by the acquisition of J-resolved spectra facilitates the recovering of sometimes hidden chemical shifts in the PS spectra. These chemical shifts can then be used to perform spectral deconvolution of the singlets. PS spectroscopy is easy to combine with deconvolution since it only requires the knowledge of the chemical shifts. An example of a deconvoluted PS spectrum by GSD is illustrated in Fig.S6.

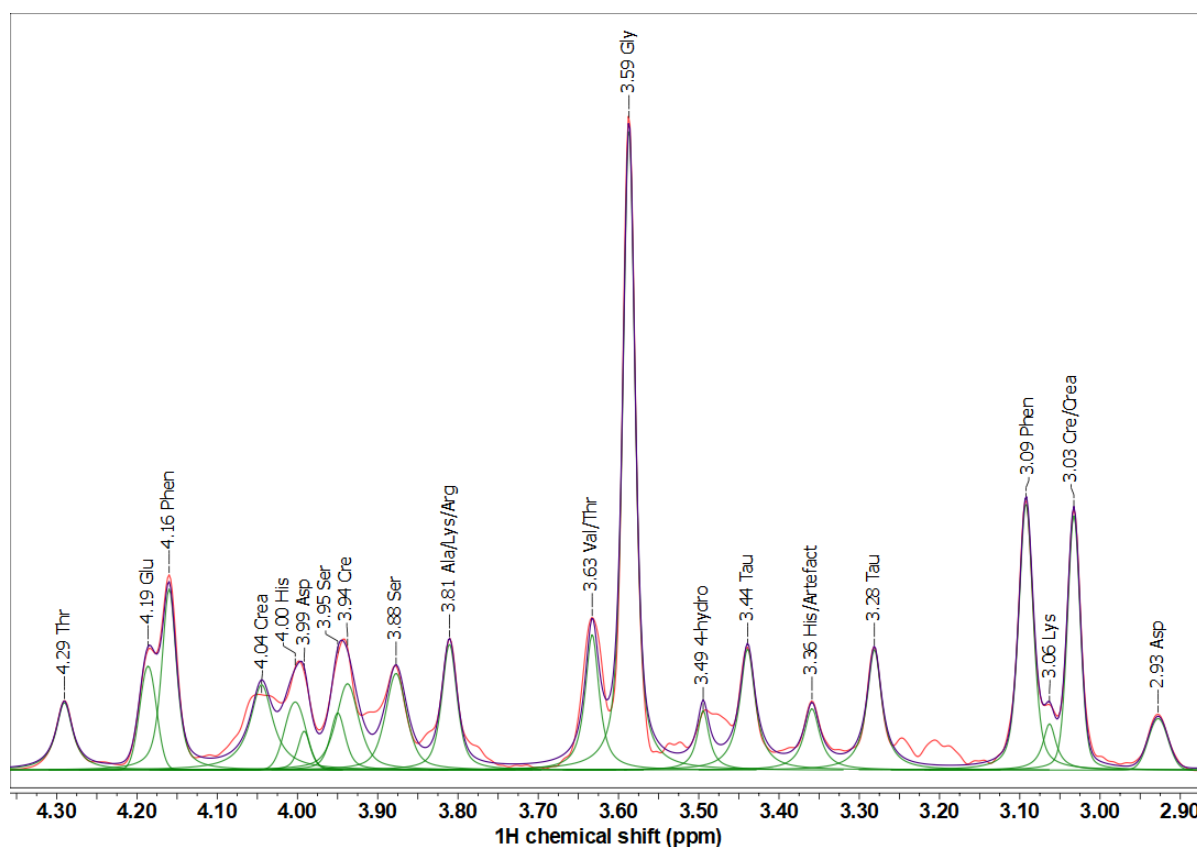

Fig.S6: Fitting of a 1D projection of a 2D J-RES DE acquisition. Fitted singlets were annotated according to Table S1 and with the help of Human Metabolome Database (HMDB). The original PS spectrum (from J-RES DE) is in red. The deconvoluted singlets are in green. The sum of the deconvoluted singlets is in indigo.



## 5. Site-by-site performances of the J-RES SE experiment

| Analytical performance of the J-RES SE experiment |             |                          |                       |
|---------------------------------------------------|-------------|--------------------------|-----------------------|
| Chemical shift (ppm)                              | Average SNR | CV of relative areas (%) | LW <sub>10</sub> (Hz) |
| 8.64                                              | 257         | 4                        | 3.8                   |
| 7.17                                              | 90          | 13                       | 4.6                   |
| 6.84                                              | 156         | 9                        | 4.2                   |
| 4.29                                              | 194         | 9                        | 4.6                   |
| 4.16                                              | 427         | 7                        | 4.2                   |
| 3.63                                              | 364         | 6                        | 4.4                   |
| 3.59                                              | 1216        | 6                        | 3.5                   |
| 3.44                                              | 292         | 11                       | 5.4                   |
| 3.28                                              | 296         | 13                       | 4.4                   |
| 3.09                                              | 588         | 9                        | 4.9                   |
| 3.03                                              | 519         | 5                        | 4.0                   |
| 2.93                                              | 130         | 11                       | 3.9                   |
| 2.73                                              | 428         | 12                       | 5.1                   |
| 1.49                                              | 1462        | 2                        | 3.6                   |
| 1.35                                              | 1332        | -                        | 4.5                   |
| 1.04                                              | 670         | 7                        | 5.4                   |
| 1.00                                              | 699         | 5                        | 4.8                   |
| <b>Average</b>                                    | <b>536</b>  | <b>8</b>                 | <b>4.4</b>            |

Table S2: Average site-by-site SNR, CV of relative areas and LW<sub>10</sub> of the J-RES SE pure shift strategy over five repetitions.

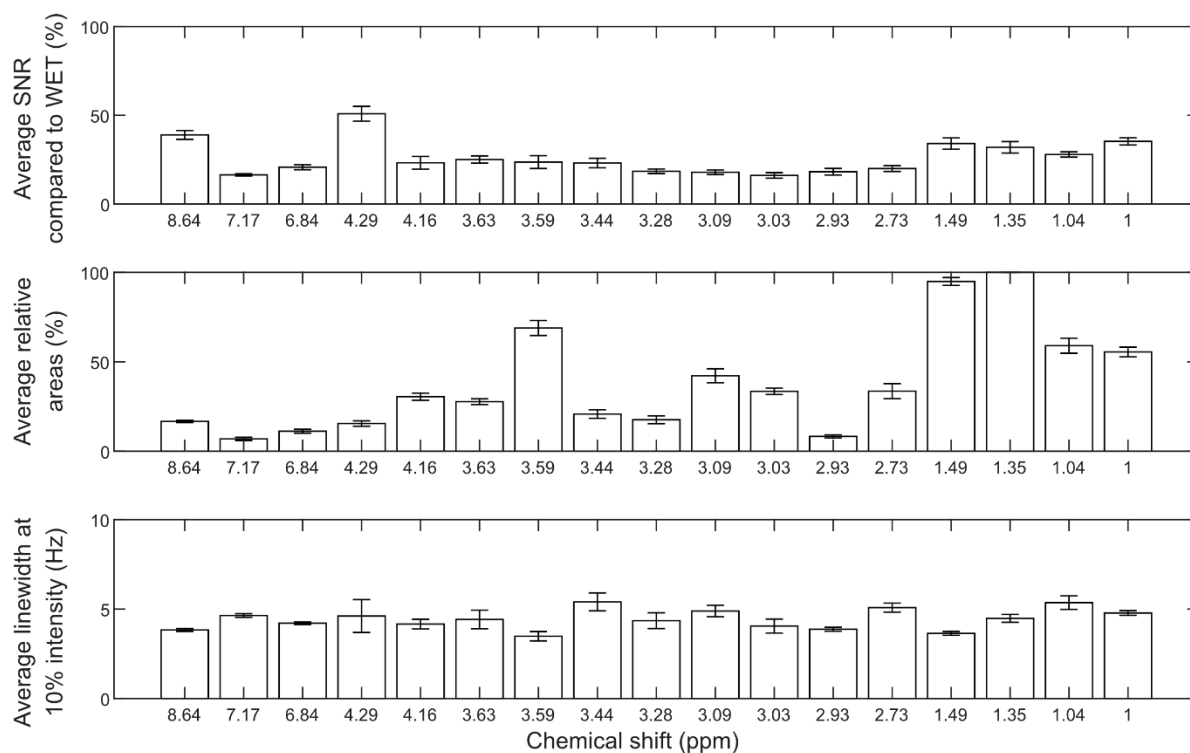

Fig.S7: Average site-by-site characterization of the analytical performance of the J-RES SE pure shift strategy over five repetitions. Top panel: average SNR compared to WET 1D <sup>1</sup>H. Middle panel: average relative areas values normalized with the signal of lactate at 1.35 ppm. Bottom panel: average linewidth at 10% of the maximum intensity of the signal.

## 6. Site-by-site performances of the J-RES DE experiment

| Analytical performance of the J-RES DE experiment |             |                          |                       |
|---------------------------------------------------|-------------|--------------------------|-----------------------|
| Chemical shift (ppm)                              | Average SNR | CV of relative areas (%) | LW <sub>10</sub> (Hz) |
| 8.64                                              | 297         | 6                        | 3.6                   |
| 7.17                                              | 70          | 4                        | 4.7                   |
| 6.84                                              | 125         | 4                        | 4.6                   |
| 4.29                                              | 177         | 2                        | 4.8                   |
| 4.16                                              | 484         | 4                        | 4.0                   |
| 3.63                                              | 363         | 6                        | 4.2                   |
| 3.59                                              | 1548        | 6                        | 2.9                   |
| 3.44                                              | 318         | 4                        | 4.6                   |
| 3.28                                              | 304         | 2                        | 4.1                   |
| 3.09                                              | 624         | 6                        | 4.5                   |
| 3.03                                              | 627         | 6                        | 3.4                   |
| 2.93                                              | 141         | 5                        | 4.1                   |
| 2.73                                              | 383         | 3                        | 4.8                   |
| 1.49                                              | 1688        | 3                        | 3.3                   |
| 1.35                                              | 1598        | -                        | 3.8                   |
| 1.04                                              | 675         | 4                        | 4.6                   |
| 1.00                                              | 735         | 5                        | 4.3                   |
| <b>Average</b>                                    | <b>597</b>  | <b>4</b>                 | <b>4.1</b>            |

Table S3: Average site-by-site SNR, CV of relative areas and LW<sub>10</sub> of the J-RES DE pure shift strategy over five repetitions.

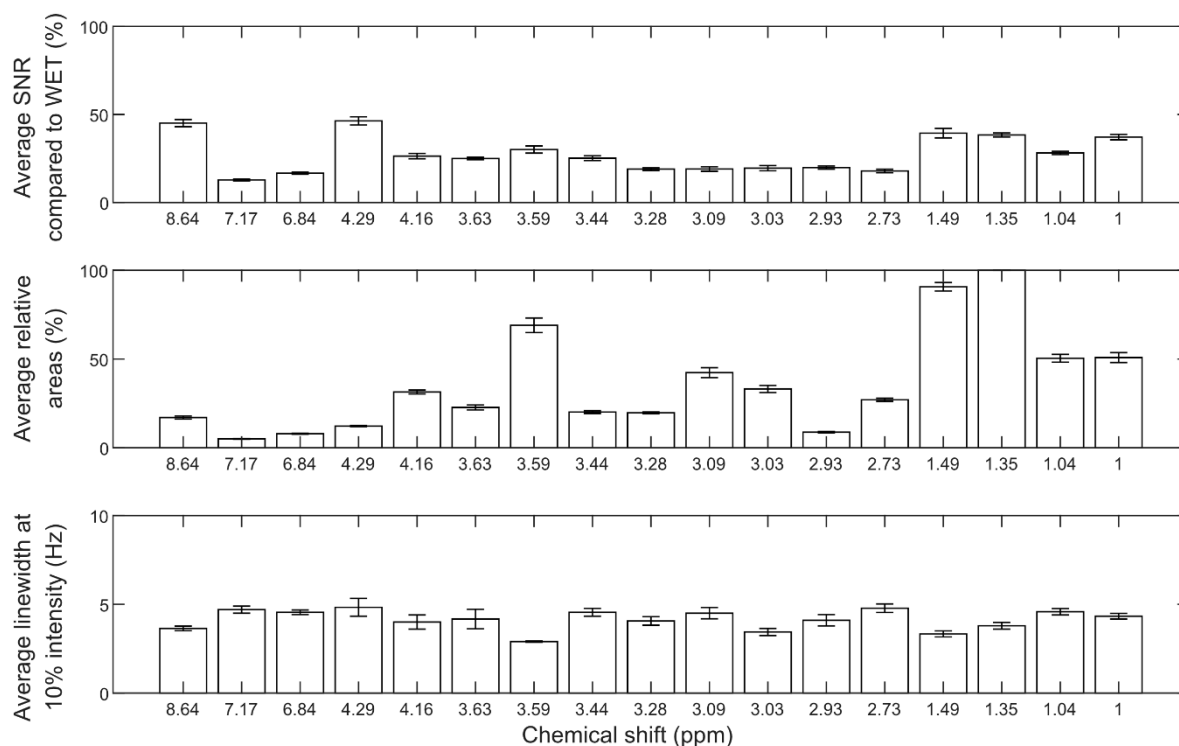

Fig.S8: Average site-by-site characterization of the analytical performance of the J-RES DE pure shift strategy over five repetitions. Top panel: average SNR compared to WET 1D <sup>1</sup>H. Middle panel: average relative areas values normalized with the signal of lactate at 1.35 ppm. Bottom panel: average linewidth at 10% of the maximum intensity of the signal.

## 7. Site-by-site performances of the J-RES Chirp experiment

| Analytical performance of the J-RES Chirp experiment |             |                          |                       |
|------------------------------------------------------|-------------|--------------------------|-----------------------|
| Chemical shift (ppm)                                 | Average SNR | CV of relative areas (%) | LW <sub>10</sub> (Hz) |
| 8.64                                                 | 85          | 3                        | 3.7                   |
| 7.17                                                 | 6           | 8                        | 4.8                   |
| 6.84                                                 | 19          | 15                       | 4.4                   |
| 4.29                                                 | 45          | 4                        | 4.8                   |
| 4.16                                                 | 118         | 5                        | 4.3                   |
| 3.63                                                 | 121         | 3                        | 4.5                   |
| 3.59                                                 | 320         | 1                        | 3.4                   |
| 3.44                                                 | 71          | 7                        | 4.2                   |
| 3.28                                                 | 57          | 4                        | 4.3                   |
| 3.09                                                 | 117         | 2                        | 4.7                   |
| 3.03                                                 | 166         | 1                        | 3.8                   |
| 2.93                                                 | 28          | 8                        | 3.9                   |
| 2.73                                                 | 152         | 2                        | 4.9                   |
| 1.49                                                 | 348         | 1                        | 3.4                   |
| 1.35                                                 | 367         | -                        | 4.0                   |
| 1.04                                                 | 134         | 4                        | 4.7                   |
| 1.00                                                 | 153         | 2                        | 4.5                   |
| <b>Average</b>                                       | <b>136</b>  | <b>4</b>                 | <b>4.2</b>            |

Table S3: Average site-by-site SNR, CV of relative areas and LW<sub>10</sub> of the J-RES Chirp pure shift strategy over five repetitions.

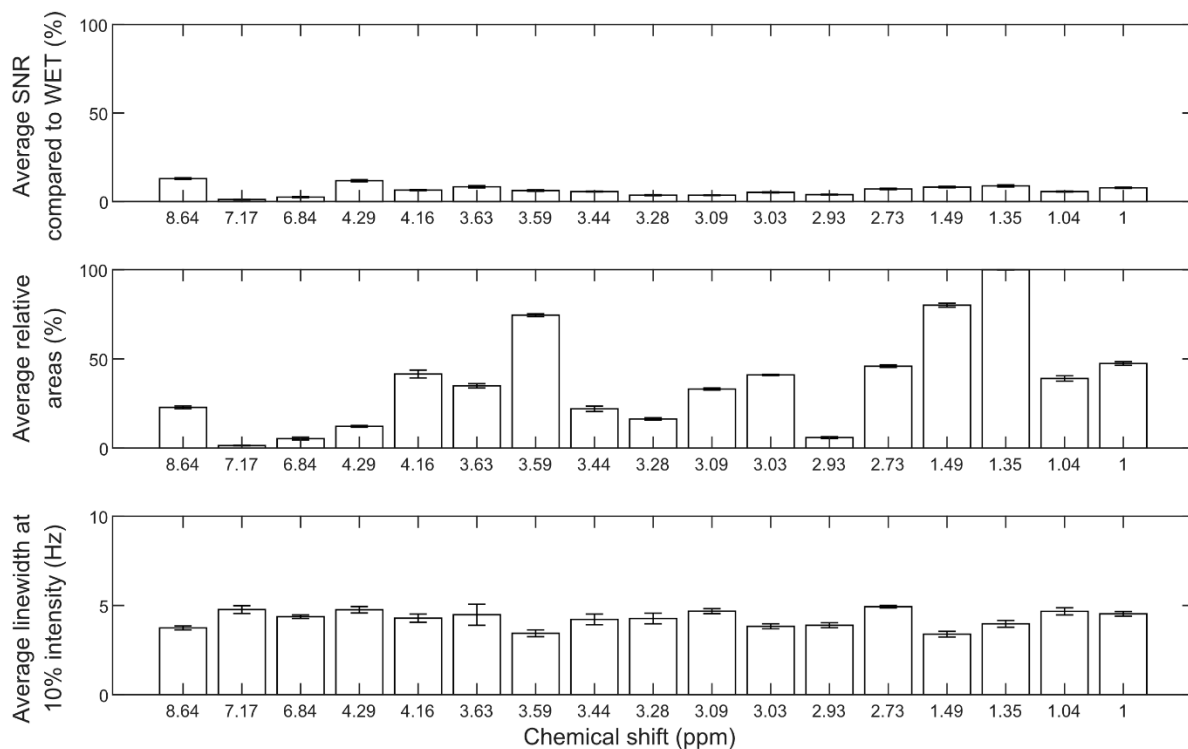

Fig.S9: Average site-by-site characterization of the analytical performance of the J-RES CHIRP pure shift strategy over five repetitions. Top panel: average SNR compared to WET 1D <sup>1</sup>H. Middle panel: average relative areas values normalized with the signal of lactate at 1.35 ppm. Bottom panel: average linewidth at 10% of the maximum intensity of the signal.

## 8. Site-by-site performances of the single-band ZS experiment

| Analytical performance of the single-band ZS experiment |             |                          |                       |
|---------------------------------------------------------|-------------|--------------------------|-----------------------|
| Chemical shift (ppm)                                    | Average SNR | CV of relative areas (%) | LW <sub>10</sub> (Hz) |
| 8.64                                                    | 11          | 7                        | 3.9                   |
| 7.17                                                    | 6           | 3                        | 2.6                   |
| 6.84                                                    | 8           | 5                        | 2.9                   |
| 4.29                                                    | 32          | 5                        | 4.2                   |
| 4.16                                                    | 89          | 5                        | 4.2                   |
| 3.63                                                    | 74          | 8                        | 4.2                   |
| 3.59                                                    | 147         | 7                        | 2.5                   |
| 3.44                                                    | 32          | 8                        | 4.2                   |
| 3.28                                                    | 36          | 8                        | 4.2                   |
| 3.09                                                    | 134         | 1                        | 3.1                   |
| 3.03                                                    | 91          | 4                        | 3.3                   |
| 2.93                                                    | 20          | 11                       | 5.5                   |
| 2.73                                                    | 0           | 0                        | -                     |
| 1.49                                                    | 151         | 1                        | 4.2                   |
| 1.35                                                    | 165         | -                        | 4.7                   |
| 1.04                                                    | 69          | 7                        | 4.4                   |
| 1.00                                                    | 71          | 6                        | 5.9                   |
| <b>Average</b>                                          | <b>67</b>   | <b>5</b>                 | <b>4.0</b>            |

Table S4: Average site-by-site SNR, CV of relative areas and LW<sub>10</sub> of the single-band ZS pure shift strategy over five repetitions.

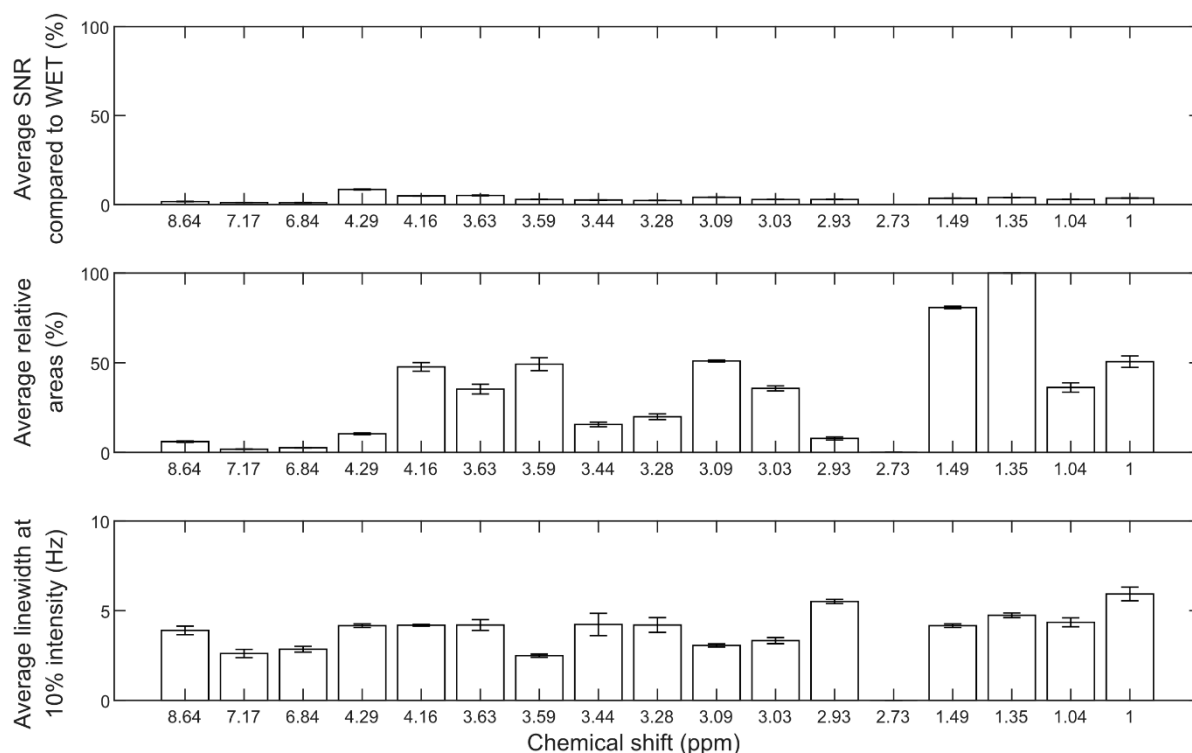

Fig.S10: Average site-by-site characterization of the analytical performance of the single-band ZS pure shift strategy over five repetitions. Top panel: average SNR compared to WET 1D <sup>1</sup>H. Middle panel: average relative areas values normalized with the signal of lactate at 1.35 ppm. Bottom panel: average linewidth at 10% of the maximum intensity of the signal.

## 9. Site-by-site performances of the dual-band ZS experiment

| Analytical performance of the dual-band ZS experiment |             |                          |                       |
|-------------------------------------------------------|-------------|--------------------------|-----------------------|
| Chemical shift (ppm)                                  | Average SNR | CV of relative areas (%) | LW <sub>10</sub> (Hz) |
| 8.64                                                  | 122         | 3                        | 3.0                   |
| 7.17                                                  | 39          | 7                        | 2.2                   |
| 6.84                                                  | 36          | 6                        | 2.6                   |
| 4.29                                                  | 46          | 24                       | 4.9                   |
| 4.16                                                  | 185         | 10                       | 4.1                   |
| 3.63                                                  | 292         | 8                        | 4.6                   |
| 3.59                                                  | 567         | 3                        | 2.8                   |
| 3.44                                                  | 137         | 5                        | 4.2                   |
| 3.28                                                  | 162         | 25                       | 4.5                   |
| 3.09                                                  | 596         | 6                        | 3.5                   |
| 3.03                                                  | 414         | 5                        | 3.5                   |
| 2.93                                                  | 103         | 7                        | 5.7                   |
| 2.73                                                  | 0           | 0                        | -                     |
| 1.49                                                  | 752         | 1                        | 4.2                   |
| 1.35                                                  | 753         | 0                        | 4.8                   |
| 1.04                                                  | 231         | 11                       | 5.2                   |
| 1.00                                                  | 219         | 8                        | 6.6                   |
| <b>Average</b>                                        | <b>274</b>  | <b>8</b>                 | <b>4.1</b>            |

Table S5: Average site-by-site SNR, CV of relative areas and LW<sub>10</sub> of the dual-band ZS pure shift strategy over five repetitions.

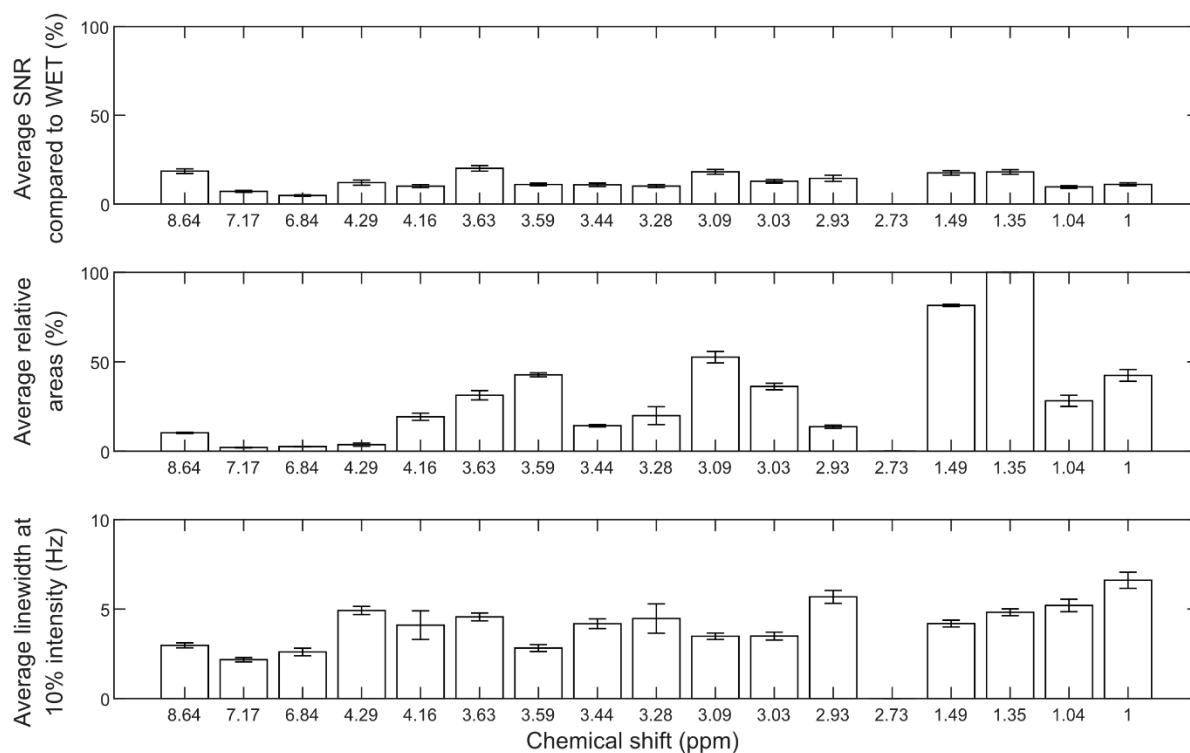

Fig.S11: Average site-by-site characterization of the analytical performance of the dual-band pure shift strategy over five repetitions. Top panel: average SNR compared to WET 1D <sup>1</sup>H. Middle panel: average relative areas values normalized with the signal of lactate at 1.35 ppm. Bottom panel: average linewidth at 10% of the maximum intensity of the signal.

## 10. Site-by-site performances of the PSYCHE experiment

| Analytical performance of the PSYCHE experiment |             |                          |                       |
|-------------------------------------------------|-------------|--------------------------|-----------------------|
| Chemical shift (ppm)                            | Average SNR | CV of relative areas (%) | LW <sub>10</sub> (Hz) |
| 8.64                                            | 37          | 20                       | 4.1                   |
| 7.17                                            | 21          | 12                       | 3.7                   |
| 6.84                                            | 32          | 19                       | 6.1                   |
| 4.29                                            | 0           | 0                        | -                     |
| 4.16                                            | 114         | 13                       | 5.9                   |
| 3.63                                            | 90          | 18                       | 6.1                   |
| 3.59                                            | 160         | 11                       | 4.0                   |
| 3.44                                            | 41          | 30                       | 5.3                   |
| 3.28                                            | 50          | 34                       | 5.0                   |
| 3.09                                            | 168         | 7                        | 4.8                   |
| 3.03                                            | 124         | 5                        | 4.6                   |
| 2.93                                            | 29          | 16                       | 3.5                   |
| 2.73                                            | 218         | 11                       | 4.5                   |
| 1.49                                            | 262         | 3                        | 5.9                   |
| 1.35                                            | 313         | -                        | 6.9                   |
| 1.04                                            | 159         | 14                       | 4.6                   |
| 1.00                                            | 166         | 19                       | 5.4                   |
| <b>Average</b>                                  | <b>117</b>  | <b>14</b>                | <b>5.0</b>            |

Table S6: Average site-by-site SNR, CV of relative areas and LW<sub>10</sub> of the PSYCHE pure shift strategy over five repetitions.

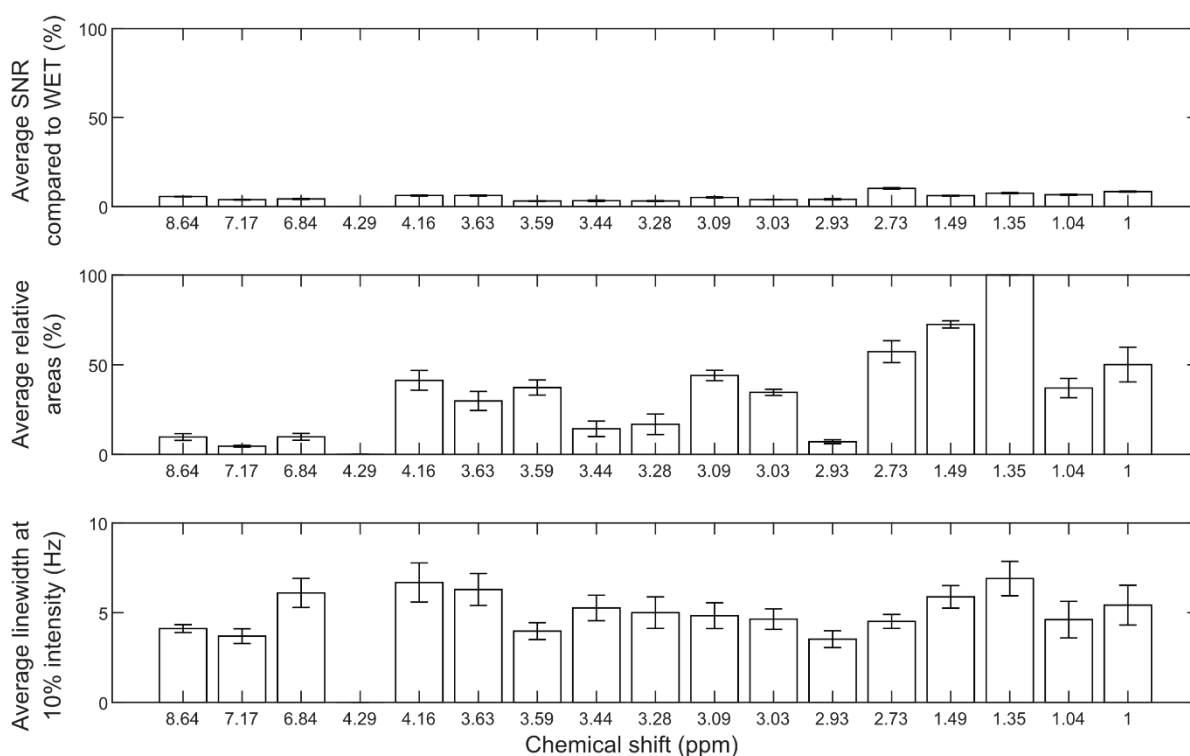

Fig.S12: Average site-by-site characterization of the analytical performance of the PSYCHE pure shift strategy over five repetitions. Top panel: average SNR compared to WET 1D <sup>1</sup>H. Middle panel: average relative areas values normalized with the signal of lactate at 1.35 ppm. Bottom panel: average linewidth at 10% of the maximum intensity of the signal.

## 11. Additional spectra of the fish feed of commercial formulation

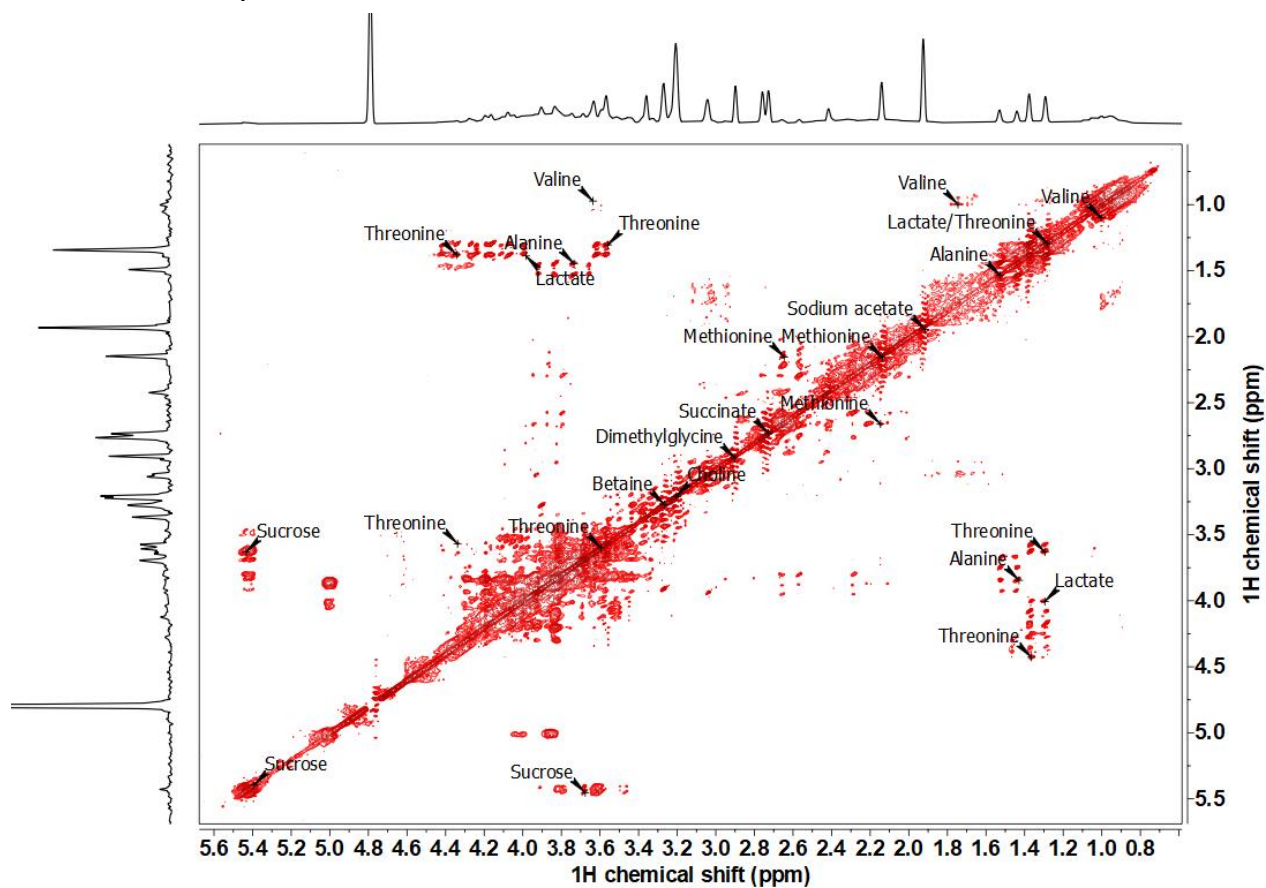

Fig.S13: WET TOCSY spectrum the fish feed of commercial formulation acquired on an 80 MHz NMR spectrometer. Signal annotation was made with the help of Human Metabolome Database (HMDB).

| <sup>1</sup> H (ppm) | <sup>13</sup> C (ppm) | Annotation      |
|----------------------|-----------------------|-----------------|
| 5.42                 | 94.76                 | Sucrose         |
| 4.18                 | 79.15                 | Sucrose         |
| 3.81                 | 62.88                 | Sucrose         |
| 3.81                 | 65.04                 | Sucrose         |
| 3.69                 | 64.04                 | Sucrose         |
| 3.57                 | 73.79                 | Sucrose         |
| 3.49                 | 71.85                 | Sucrose         |
| 3.28                 | 56.04                 | Betaine         |
| 3.2                  | 56.57                 | Choline         |
| 3.04                 | 41.8                  | Lysine          |
| 2.92                 | 47.27                 | Dimethylglycine |
| 2.73                 | 37.14                 | Succinate       |
| 2.16                 | 16.57                 | Methionine      |
| 1.95                 | 25.86                 | Sodium acetate  |
| 1.46                 | 18.88                 | Alanine         |
| 1.3                  | 22.87                 | Lactate         |
| 1.3                  | 22.04                 | Threonine       |
| 0                    | 0                     | TSP             |

Table S7: Full <sup>1</sup>H and <sup>13</sup>C annotations of the fish feed of commercial formulation for the HSQC-ME presented in Fig.S14. Signal annotation was made with the help of Human Metabolome Database (HMDB).



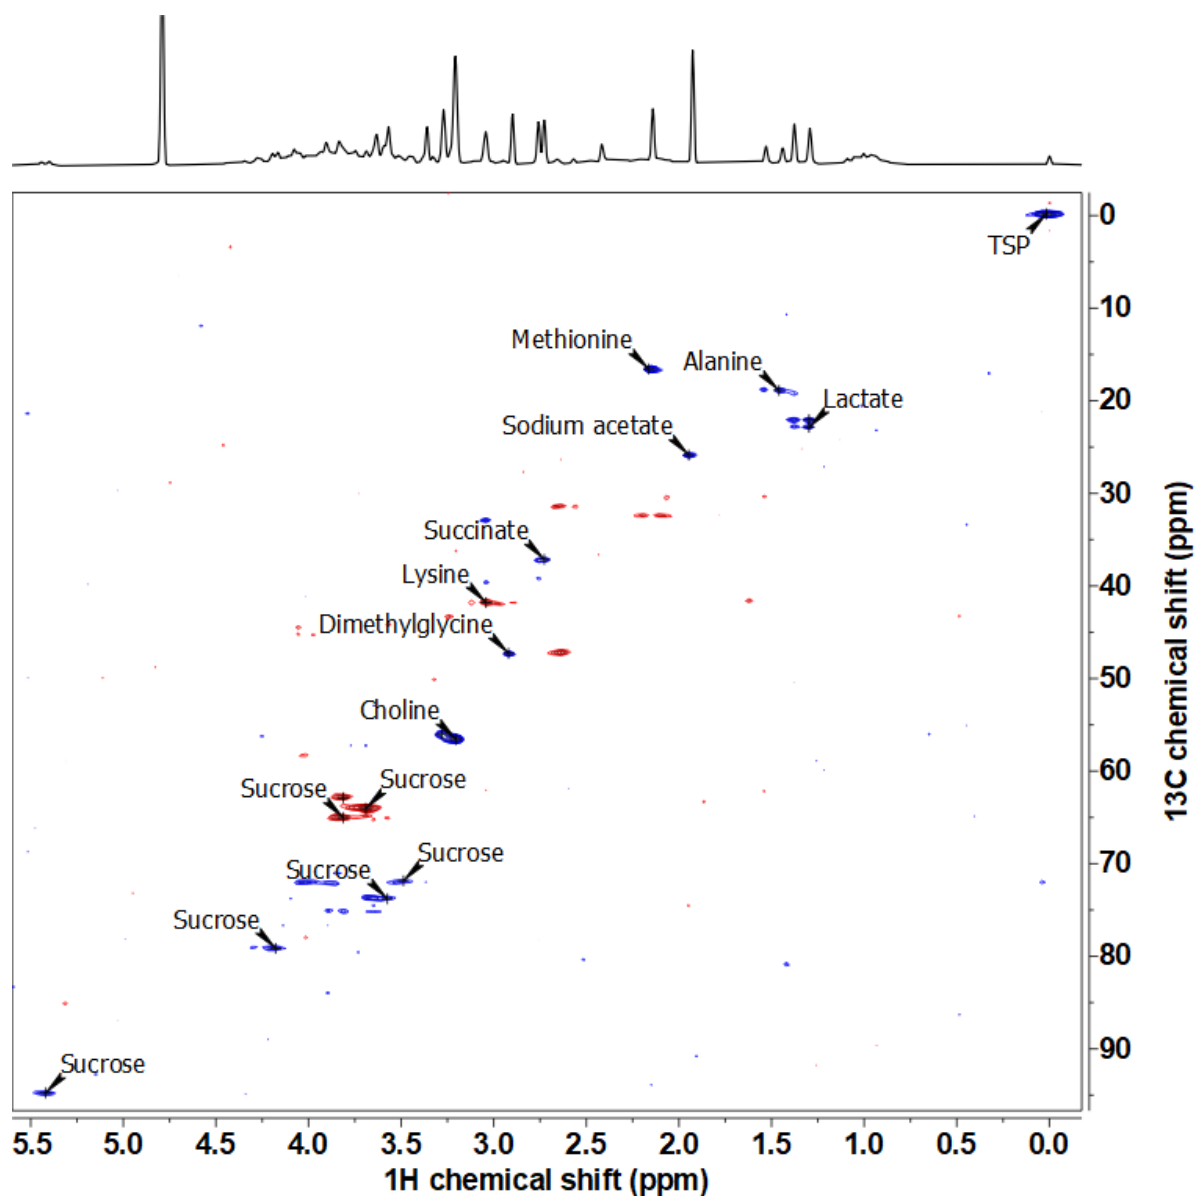

Fig.S14: Heteronuclear Single Quantum Correlation Multiplicity-Edited (HSQC-ME) spectrum of fish feed of commercial formulation acquired on an 80 MHz NMR spectrometer. Signal annotation was made with the help of Human Metabolome Database (HMDB).

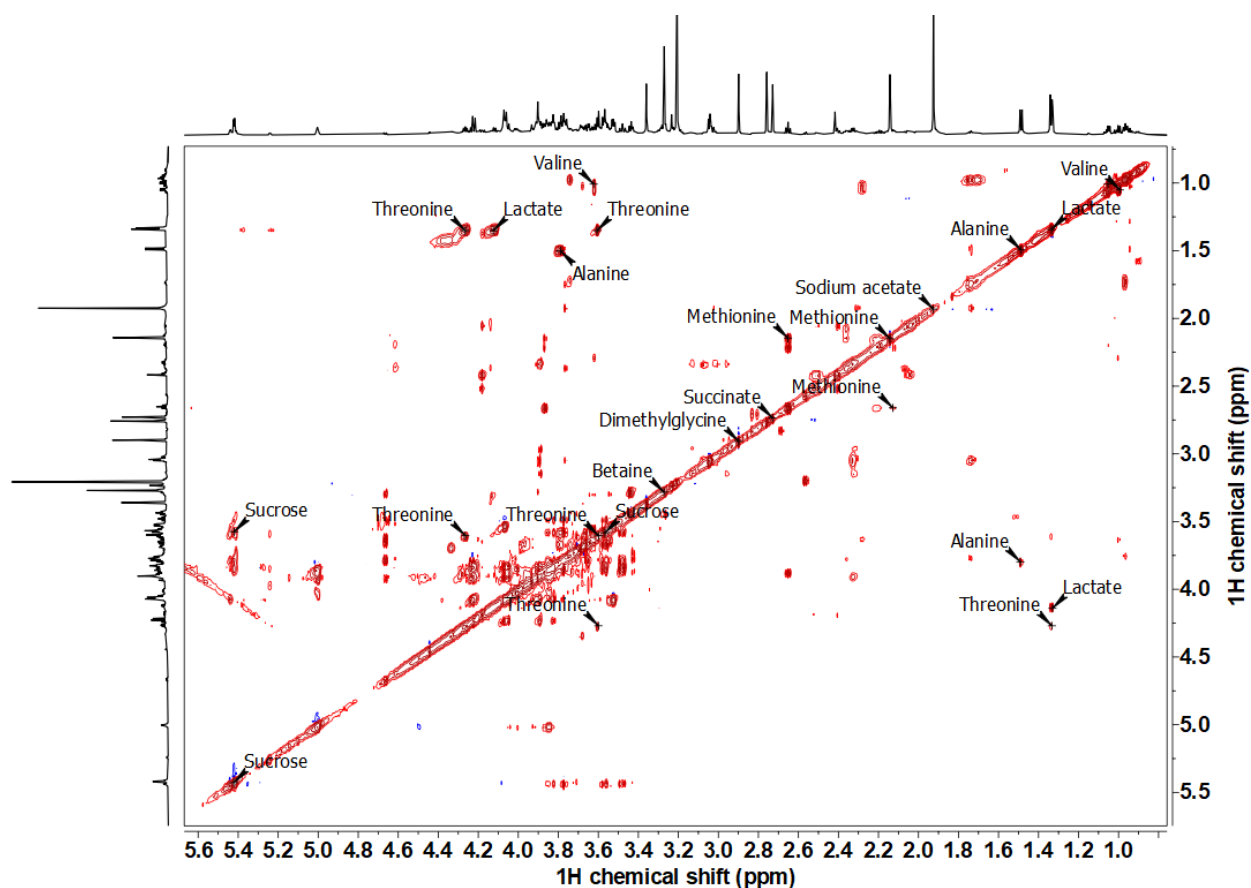

Fig.S15: T2 project zTOCSY spectrum the fish feed of commercial formulation acquired on a 700 MHz NMR spectrometer. Signal annotation was made with the help of Human Metabolome Database (HMDB).

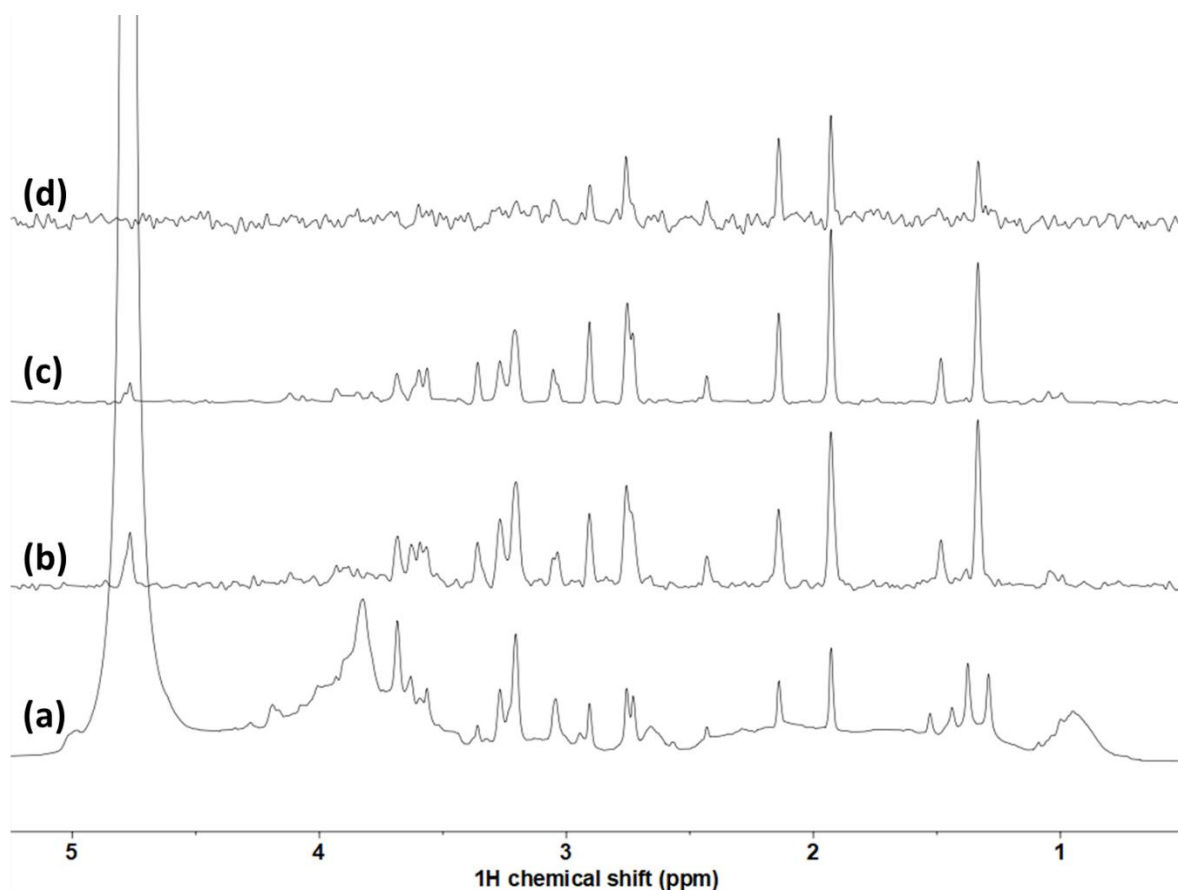

Fig.S16: Additional PS NMR spectra of the commercial fish feed extract (COM). **(a)** 1D  $^1\text{H}$  NMR spectrum **(b)** 1D projection of a WET 2D J-resolved single echo spectrum. **(c)** 1D projection of a WET 2D J-resolved double echo spectrum. **(d)** 1D projection of a WET 2D J-resolved chirp spectrum. Acquisition and processing parameters are similar to those used for the analytical comparison of the model mixture.

The additional PS spectra shown in Figure S16 clearly shows the lower sensitivity of the J-RES Chirp strategy, with missing singlets and a noisier baseline. The more sensitive J-RES SE and J-RES DE spectra show similar information, but the SNR of the J-RES DE approach are higher in average, which is consistent with the observations made on the model mixture of metabolites. SNRs of the J-RES SE approach range from 7 to 38 while SNRs of the J-RES DE approach range from 13 to 86.

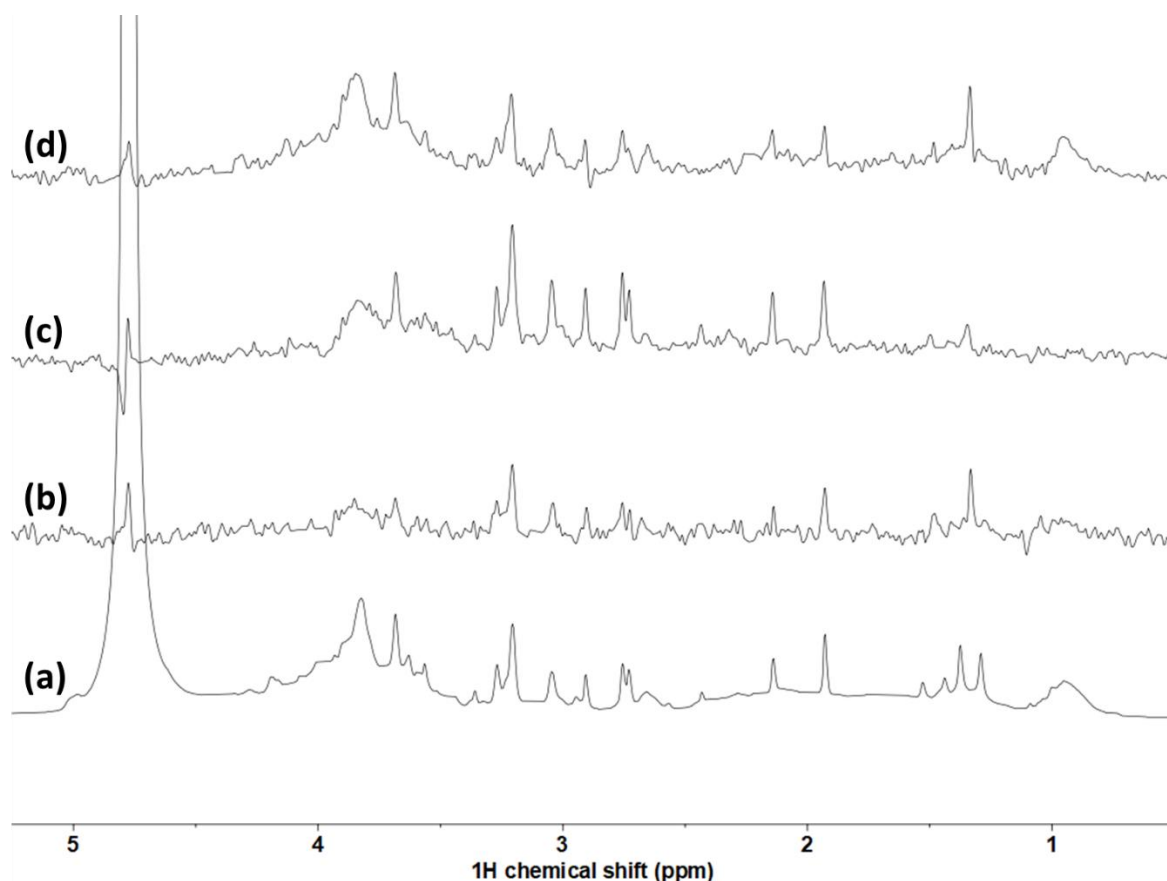

Fig.S17: Additional PS NMR spectra of the commercial fish feed extract (COM). **(a)** 1D  $^1\text{H}$  NMR spectrum **(b)** WET single-band Zangger-Sterk spectrum. **(c)** WET double-band Zangger-Sterk spectrum. **(d)** WET PSYCHE spectrum. Acquisition and processing parameters are similar to those used for the analytical comparison of the model mixture.

The additional PS spectra shown in Figure S17 show the lack of sensitivity of the gradient-encoded PS strategies: especially for the single-band ZS and PSYCHE strategies. SNR on the detected singlets are very low and there is much more noise.
